# Supplementary material for: Trends in Use of Next-Generation Sequencing in Patients With Solid Tumors by Race and Ethnicity After Implementation of the Medicare National Coverage Determination
Source: PubMed Central journal article supplement — JAMA Netw Open. 2021 Dec 9;4(12):e2138219. doi: 10.1001/jamanetworkopen.2021.38219 (PMC8662372; doi:10.1001/jamanetworkopen.2021.38219), 2021-12-09

## Supplementary Online Content

Sheinson DM, Wong WB, Meyer CS, et al. Trends in use of next-generation sequencing in patients with solid tumors by race and ethnicity after implementation of the Medicare national coverage determination. *JAMA Netw Open*. 2021;4(12):e2138219.  
doi:10.1001/jamanetworkopen.2021.38219

**eFigure.** Association Between Medicare NCD and Changes in Average NGS Testing Utilization by Race/Ethnicity Among Overall and Medicare Patients Only

This supplementary material has been provided by the authors to give readers additional information about their work.

eFigure. Association Between the Medicare NCD and Changes in Average NGS Testing Use by Race and Ethnicity Among the Overall Population (A) and Medicare Beneficiaries Only (B)

**A Difference-in-Difference Model in Overall Population**

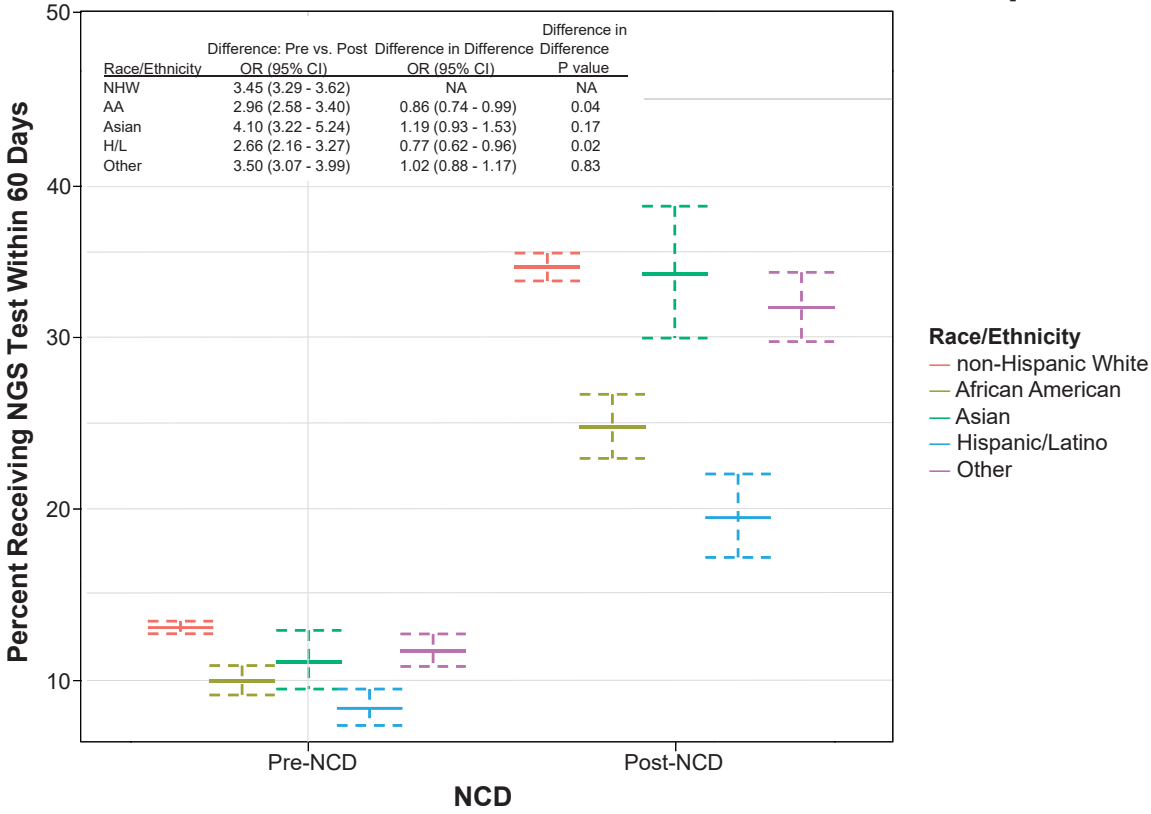

## B Difference-in-Difference Model in Medicare Beneficiaries Only

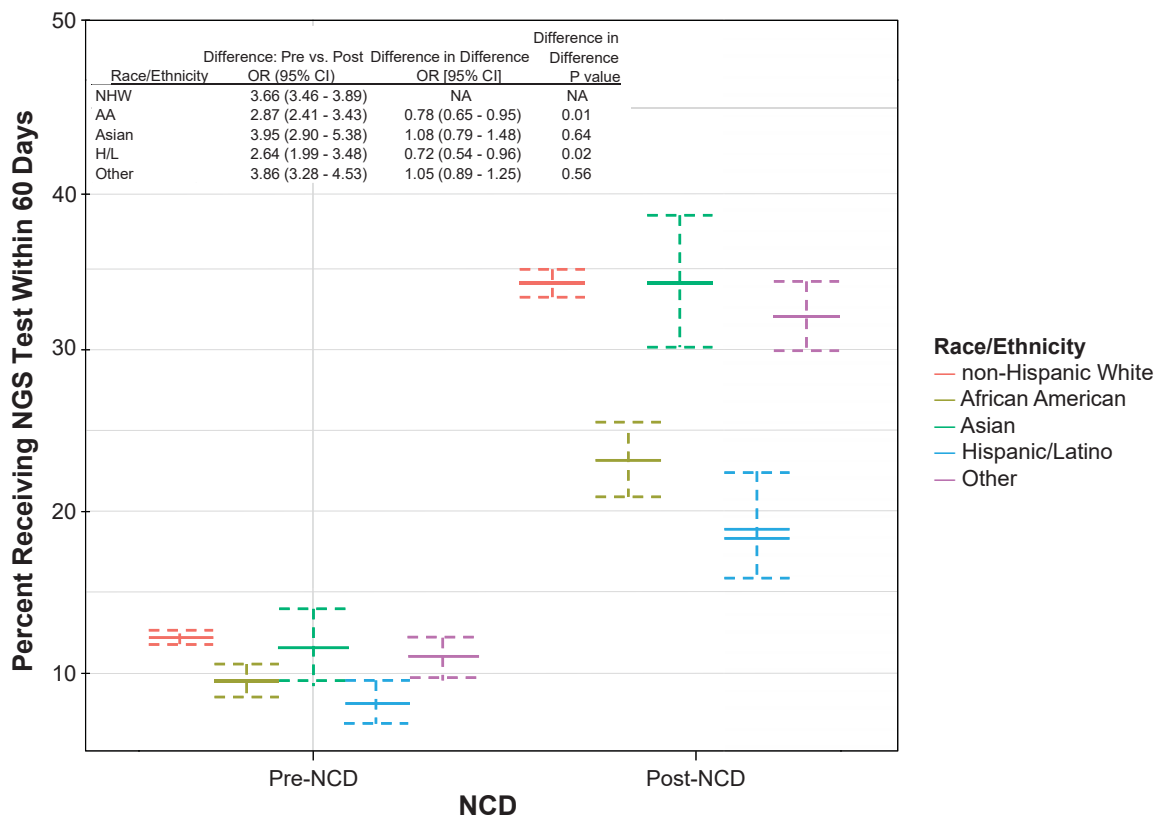

Supplement: jamanetwopen-e2138219-s001.pdf [file jamanetwopen-e2138219-s001.pdf]
